# Supplementary material for: Indirect Interspecies Regulation: Transcriptional and Physiological Responses of a Cyanobacterium to Heterotrophic Partnership
Source: PubMed Central journal article supplement (PMC5340862; doi:10.1128/msystems.00181-16), 2017-03-07
Supplement: sys002172092sf4.pdf [file sys002172092sf4.pdf]

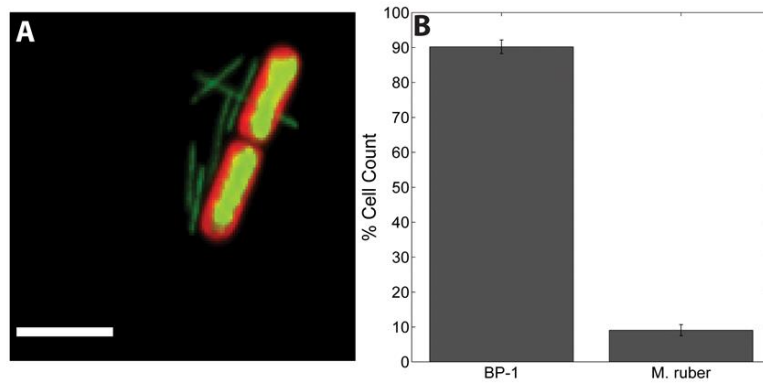

**Figure S1.** A) A representative confocal micrograph (1 of 40) showing cells maintained as a stable, photosynthetically supported binary culture of *T. elongatus* (red; autofluorescence) supporting *M. ruber* (green; SYBR Gold). Scale bar represents 10  $\mu\text{m}$ . B) Relative abundances measured in % cells counted via fluorescence activated cell sorting. Values represent the mean from three independent steady states held under different oxygen tensions ( $\text{pO}_2 = 0, 0.3$  and  $0.6 \text{ ATM-O}_2$ ). Error bars represent  $\pm 1$  standard deviation.
