# Supplementary material for: Indirect Interspecies Regulation: Transcriptional and Physiological Responses of a Cyanobacterium to Heterotrophic Partnership
Source: PubMed Central journal article supplement (PMC5340862; doi:10.1128/msystems.00181-16), 2017-03-07
Supplement: sys002172092sf5.pdf [file sys002172092sf5.pdf]

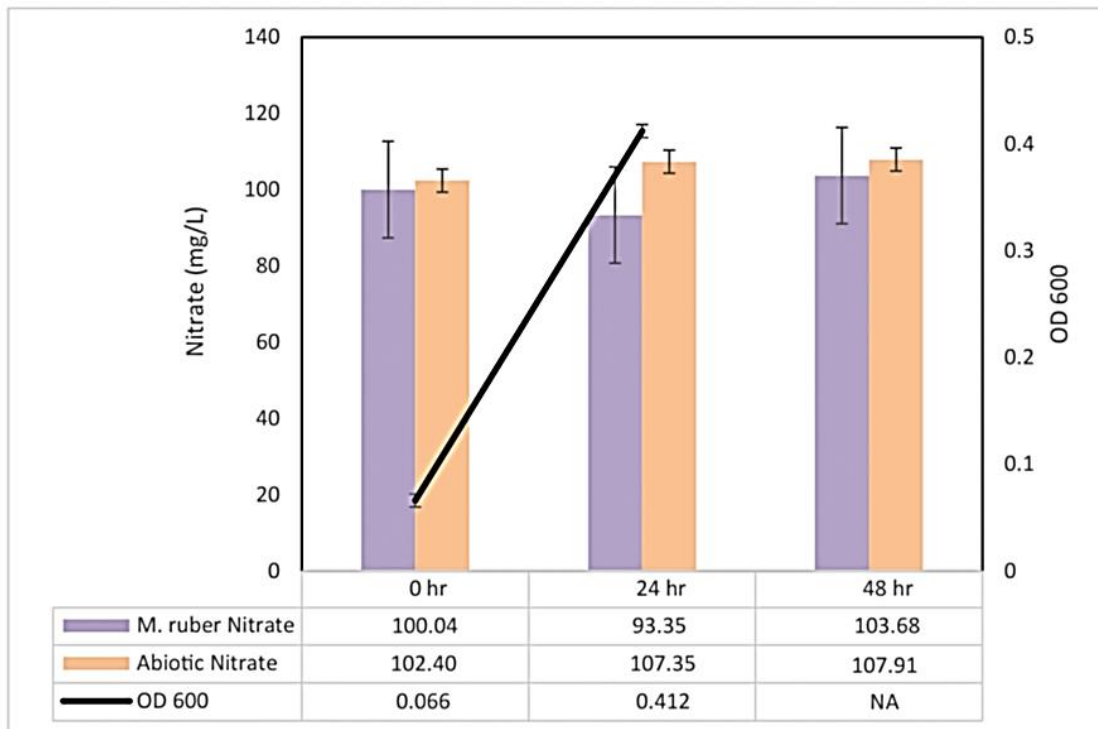

**Figure S2.** Batch growth and nitrate assay. Each data point represents the mean from three biological replicates. The optical density (OD 600) of *M. ruber* cells are matched to the *M. ruber* Nitrate samples. Error bars represent  $\pm 1$  standard deviation. The abiotic control experiment revealed no change in nitrate concentration and remained constant at  $106 \pm 3 \text{ mg L}^{-1}$  over 48 h.
