# Supplementary material for: Indirect Interspecies Regulation: Transcriptional and Physiological Responses of a Cyanobacterium to Heterotrophic Partnership
Source: PubMed Central journal article supplement (PMC5340862; doi:10.1128/msystems.00181-16), 2017-03-07
Supplement: sys002172092sf6.pdf [file sys002172092sf6.pdf]

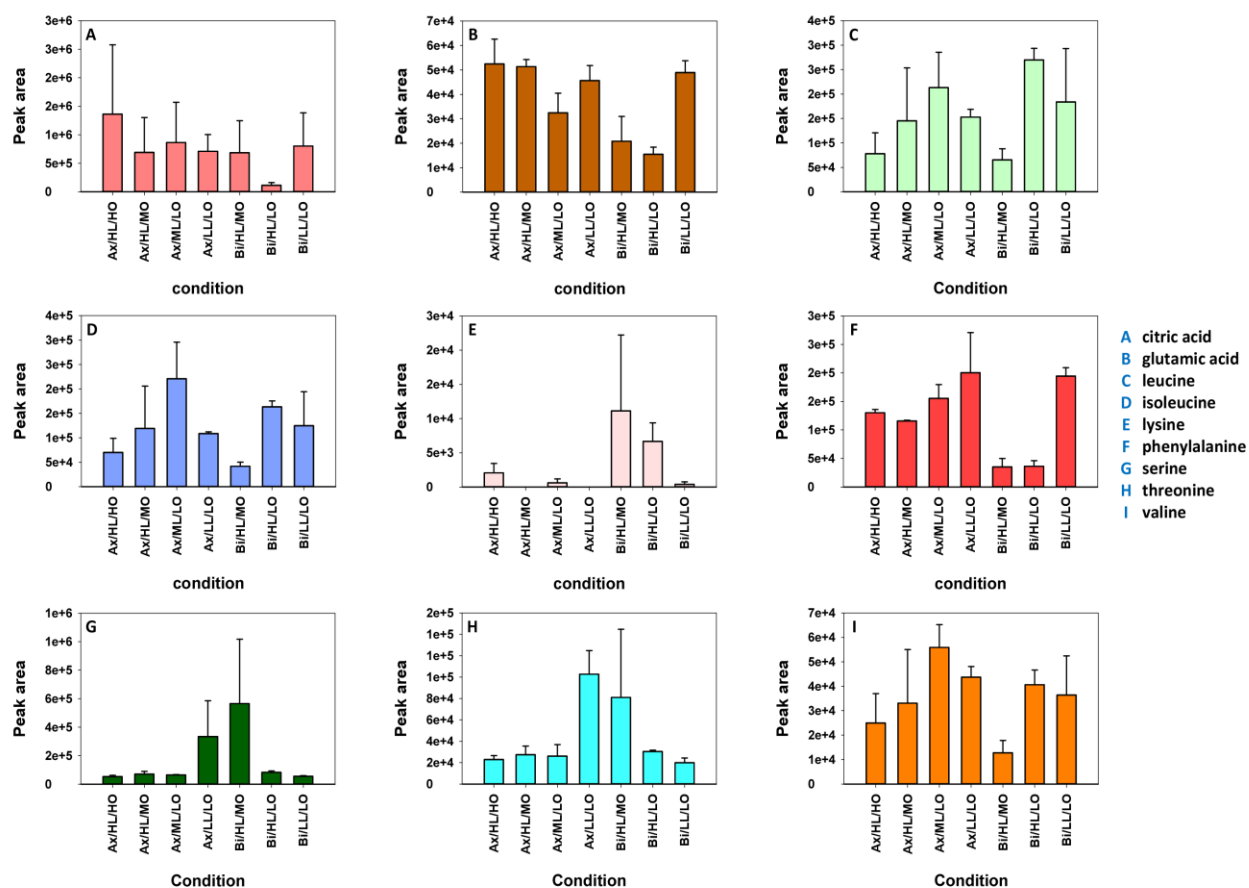

**Figure S3.** Extracellular metabolite measurements of axenic *T. elongatus* (Ax) and the binary culture (Bi). Specific turbidostat steady-state conditions are designated with the following abbreviations: high light (1995  $\mu\text{mol photons m}^{-2} \text{s}^{-1}$ ; HL), medium light (1190  $\mu\text{mol photons m}^{-2} \text{s}^{-1}$ ; ML), low light (197  $\mu\text{mol photons m}^{-2} \text{s}^{-1}$ ; LL), high O<sub>2</sub> (pO<sub>2</sub>=0.6 ATM; HO), medium O<sub>2</sub> (pO<sub>2</sub>=0.3 ATM; MO) and low O<sub>2</sub> (pO<sub>2</sub>=0.0 ATM; MO). Measurements are the mean from two biological replicates with standard error.
