# Supplementary material for: Indirect Interspecies Regulation: Transcriptional and Physiological Responses of a Cyanobacterium to Heterotrophic Partnership
Source: PubMed Central journal article supplement (PMC5340862; doi:10.1128/msystems.00181-16), 2017-03-07
Supplement: sys002172092sf8.pdf [file sys002172092sf8.pdf]

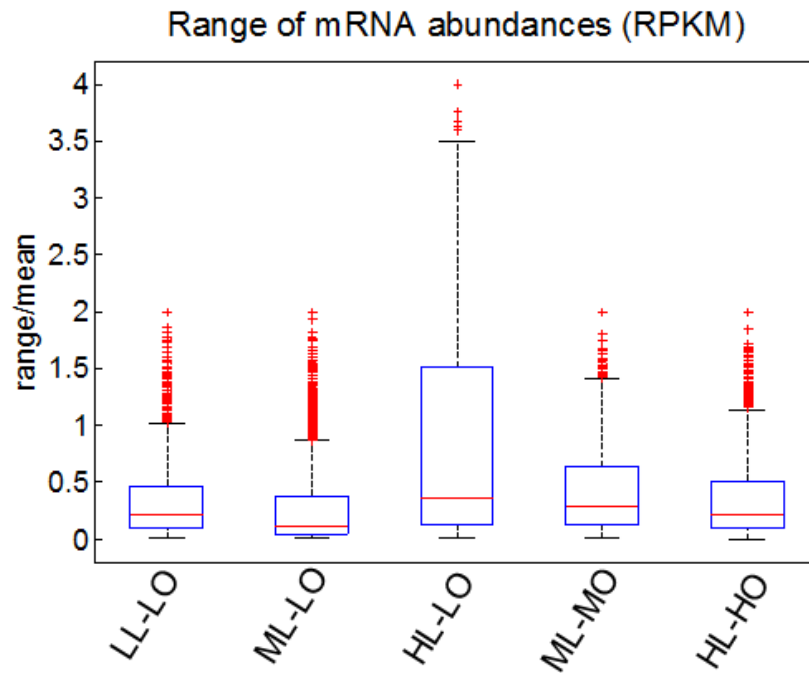

**Figure S5.** Concordance of replication shown as the ranges between biological replicate measurements of mRNA abundances (RPKM) values for 4492 genes at each steady-state condition for which species resolved gene expression was analyzed; binary cultivation of *T. elongatus* and *M. ruber*. Specific turbidostat steady-state conditions are designated with the following abbreviations: high-light ( $1995 \mu\text{mol photons m}^{-2} \text{s}^{-1}$ ; HL), medium-light ( $1190 \mu\text{mol photons m}^{-2} \text{s}^{-1}$ ; ML), low-light ( $197 \mu\text{mol photons m}^{-2} \text{s}^{-1}$ ; LL), high- $\text{O}_2$  ( $\text{pO}_2=0.6 \text{ ATM}$ ; HO), medium- $\text{O}_2$  ( $\text{pO}_2=0.3 \text{ ATM}$ ; MO) and low- $\text{O}_2$  ( $\text{pO}_2=0.0 \text{ ATM}$ ; MO). Replication of transcriptomic analyses was performed in duplicate with the exception of condition HL-LO which was performed in quadruplicate.
