# Supplementary material for: Indirect Interspecies Regulation: Transcriptional and Physiological Responses of a Cyanobacterium to Heterotrophic Partnership
Source: PubMed Central journal article supplement (PMC5340862; doi:10.1128/msystems.00181-16), 2017-03-07
Supplement: sys002172092st9.pdf [file sys002172092st9.pdf]

**Table S1.** Statistical/functional enrichment of *T. elongatus* gene functions within clusters of mRNA profiles.

| Subsystem                                  | Cluster          | Eigen-Gene | p-value | % in Module | % in Genome | Ratio |
|--------------------------------------------|------------------|------------|---------|-------------|-------------|-------|
| allophycocyanin biosynthesis               | A-light          |            | 0.026   | 1.493       | 0.245       | 6.1   |
| cytochrome c oxidase CoxABCD               | A-light          |            | 0.049   | 0.995       | 0.123       | 8.1   |
| glycine cleavage system GcvHLPT            | A-light          |            | 0.049   | 0.995       | 0.123       | 8.1   |
| photosystem II other common subunits       | A-light          |            | 0.035   | 1.990       | 0.532       | 3.7   |
| RNA polymerase sigma factors               | A-light          |            | 0.045   | 1.493       | 0.327       | 4.6   |
| double strand breaks repair                | B-light          |            | 0.021   | 1.569       | 0.327       | 4.8   |
| photorespiration (oxidative C2 cycle)      | B-light          |            | 0.047   | 0.784       | 0.082       | 9.6   |
| coenzyme A biosynthesis from pantothenate  | C-light          |            | 0.045   | 0.713       | 0.164       | 4.4   |
| Uncharacterized Function                   | C-light          |            | 0.000   | 51.693      | 42.781      | 1.2   |
| F1/F0 ATPase AtpABCDEFGH                   | D-light          |            | 0.039   | 1.094       | 0.409       | 2.7   |
| NAD(P)H:quinone oxidoreductase (complex I) | D-light          |            | 0.013   | 2.079       | 0.941       | 2.2   |
| ribosome large subunit                     | D-light          |            | 0.000   | 3.501       | 1.309       | 2.7   |
| ribosome small subunit                     | D-light          |            | 0.039   | 1.751       | 0.859       | 2.0   |
| tRNA aminoacylation                        | D-light          |            | 0.026   | 1.860       | 0.859       | 2.2   |
| c-type cytochrome biogenesis_ system II    | E-O <sub>2</sub> |            | 0.034   | 0.948       | 0.082       | 11.6  |
| cytochrome b6-f complex                    | E-O <sub>2</sub> |            | 0.012   | 1.896       | 0.327       | 5.8   |
| F1/F0 ATPase                               | E-O <sub>2</sub> |            | 0.021   | 1.896       | 0.409       | 4.6   |
| NAD(P)H:quinone oxidoreductase (complex I) | E-O <sub>2</sub> |            | 0.000   | 5.213       | 0.941       | 5.5   |
| photosystem I main subunits                | E-O <sub>2</sub> |            | 0.029   | 1.422       | 0.245       | 5.8   |
| phycocyanin biosynthesis                   | E-O <sub>2</sub> |            | 0.003   | 2.370       | 0.368       | 6.4   |
| RNA polymerase sigma factors               | F-O <sub>2</sub> |            | 0.038   | 1.604       | 0.327       | 4.9   |
| RND-type exporter Rnd3                     | F-O <sub>2</sub> |            | 0.027   | 1.070       | 0.082       | 13.1  |
| Sodium:hydrogen antiport                   | F-O <sub>2</sub> |            | 0.029   | 1.604       | 0.286       | 5.6   |
| ribosome large subunit                     | G-O <sub>2</sub> |            | 0.000   | 3.505       | 1.309       | 2.7   |
| ribosome small subunit                     | G-O <sub>2</sub> |            | 0.006   | 2.081       | 0.859       | 2.4   |
| tRNA aminoacylation                        | G-O <sub>2</sub> |            | 0.039   | 1.752       | 0.859       | 2.0   |
| iron-sulfur cluster assembly SUF system    | H-O <sub>2</sub> |            | 0.046   | 0.901       | 0.327       | 2.8   |
| Uncharacterized Function                   | H-O <sub>2</sub> |            | 0.007   | 48.09       | 42.78       | 1.1   |
