# Supplementary material for: Indirect Interspecies Regulation: Transcriptional and Physiological Responses of a Cyanobacterium to Heterotrophic Partnership
Source: PubMed Central journal article supplement (PMC5340862; doi:10.1128/msystems.00181-16), 2017-03-07
Supplement: sys002172092st10.pdf [file sys002172092st10.pdf]

**Table S2.** Statistical/functional enrichment of *M. ruber* gene functions within clusters of mRNA profiles.

| Subsystem                                                 | Cluster | Eigen-Gene | p-value | % in Module | % in Genome | Ratio |
|-----------------------------------------------------------|---------|------------|---------|-------------|-------------|-------|
| homoprotocatechuate degradation                           | A-light |            | 0.033   | 1.158       | 0.209       | 5.5   |
| peptides/nickel transport system PE                       | A-light |            | 0.000   | 4.633       | 0.943       | 4.9   |
| polar amino acid transport system PA                      | A-light |            | 0.023   | 1.158       | 0.175       | 6.6   |
| simple sugar transport system SS                          | A-light |            | 0.044   | 1.158       | 0.244       | 4.7   |
| translation elongation factor                             | A-light |            | 0.015   | 1.158       | 0.140       | 8.3   |
| xanthine degradation to urate                             | A-light |            | 0.037   | 0.772       | 0.070       | 11.1  |
| arsenical resistance system                               | B-light |            | 0.021   | 1.064       | 0.070       | 15.2  |
| chromosome partitioning proteins_inhibitors of FtsZ assem | B-light |            | 0.048   | 1.064       | 0.140       | 7.6   |
| iron homeostasis                                          | B-light |            | 0.021   | 1.064       | 0.070       | 15.2  |
| lipopolysaccharide export system LptABCDEFGF              | B-light |            | 0.015   | 1.596       | 0.209       | 7.6   |
| transcription termination - antitermination Nus factors   | B-light |            | 0.033   | 1.064       | 0.105       | 10.2  |
| adhesion                                                  | C-light |            | 0.014   | 0.901       | 0.140       | 6.5   |
| chromosome partitioning proteins                          | C-light |            | 0.040   | 1.126       | 0.349       | 3.2   |
| CRISPR immunity                                           | C-light |            | 0.025   | 2.252       | 0.943       | 2.4   |
| iron (III) transport system AfuABC                        | C-light |            | 0.035   | 0.901       | 0.209       | 4.3   |
| NitT/TauT family transport system SN                      | C-light |            | 0.015   | 1.126       | 0.244       | 4.6   |
| phosphate signalling cascade PhoBRU-PstABCS               | C-light |            | 0.004   | 1.351       | 0.244       | 5.5   |
| RND efflux pump                                           | C-light |            | 0.006   | 1.126       | 0.175       | 6.5   |
| spermidine/putrescine uptake system PotABCD               | C-light |            | 0.025   | 1.351       | 0.419       | 3.2   |
| TCA cycle second carbon oxidation                         | C-light |            | 0.035   | 0.676       | 0.105       | 6.5   |
| tetrahydrofolate biosynthesis from GTP and PABA           | C-light |            | 0.035   | 0.901       | 0.209       | 4.3   |
| menaquinone biosynthesis via futasoline                   | D-light |            | 0.027   | 1.235       | 0.279       | 4.4   |
| phenylacetate degradation to succinyl-CoA                 | D-light |            | 0.000   | 3.086       | 0.524       | 5.9   |
| ribosome large subunit                                    | D-light |            | 0.000   | 4.012       | 1.152       | 3.5   |
| ribosome small subunit                                    | D-light |            | 0.005   | 2.469       | 0.698       | 3.5   |
| B12 biosynthesis late steps                               | E-O2    |            | 0.027   | 0.915       | 0.140       | 6.5   |
| B12 salvage                                               | E-O2    |            | 0.009   | 1.220       | 0.175       | 7.0   |
| galactose degradation                                     | E-O2    |            | 0.028   | 1.220       | 0.279       | 4.4   |
| lactose uptake system LacEFGK                             | E-O2    |            | 0.017   | 0.915       | 0.105       | 8.7   |
| peptidoglycan biosynthesis                                | E-O2    |            | 0.003   | 2.134       | 0.454       | 4.7   |
| phenylacetate degradation to succinyl-CoA                 | E-O2    |            | 0.047   | 1.524       | 0.524       | 2.9   |
| RND efflux pump                                           | E-O2    |            | 0.009   | 1.220       | 0.175       | 7.0   |
| spermidine/putrescine uptake system PotABCD               | E-O2    |            | 0.000   | 2.439       | 0.419       | 5.8   |
| lactate utilization                                       | F-O2    |            | 0.015   | 0.971       | 0.105       | 9.3   |
| lipopolysaccharide export system LptABCDEFGF              | F-O2    |            | 0.049   | 0.971       | 0.209       | 4.6   |
| OMP chaperone system: SurA-Skp-DegP                       | F-O2    |            | 0.050   | 0.647       | 0.070       | 9.3   |
| simple sugar transport system                             | F-O2    |            | 0.017   | 1.294       | 0.244       | 5.3   |
| twin-arginine protein export system TatABCE               | F-O2    |            | 0.015   | 0.971       | 0.105       | 9.3   |
| xanthine degradation to urate                             | F-O2    |            | 0.050   | 0.647       | 0.070       | 9.3   |
| zinc/manganese/iron(II) uptake system TroABCD             | F-O2    |            | 0.024   | 0.971       | 0.140       | 7.0   |
| fructose uptake system FrcABC                             | G-O2    |            | 0.040   | 0.641       | 0.105       | 6.1   |
| NADH dehydrogenase I NuoABCDEFGHIJKLMN                    | G-O2    |            | 0.007   | 1.709       | 0.489       | 3.5   |
| ribosome large subunit                                    | G-O2    |            | 0.005   | 2.991       | 1.152       | 2.6   |
| TCA cycle                                                 | G-O2    |            | 0.018   | 1.068       | 0.244       | 4.4   |
| V-type ATPase AtpABCDEFGHGIK                              | G-O2    |            | 0.000   | 1.923       | 0.314       | 6.1   |
| branched chain amino acid biosynthesis                    | H-O2    |            | 0.015   | 1.034       | 0.175       | 5.9   |
| peptides/nickel transport system PE                       | H-O2    |            | 0.009   | 2.584       | 0.943       | 2.7   |
